# Supplementary material for: Proteome-Wide Identification and Functional Analysis of Lysine Crotonylation in Trichophyton rubrum Conidial and Mycelial Stages
Source: Front Genet. 2022 Mar 10;13:832668. doi: 10.3389/fgene.2022.832668 (PMC8960058; doi:10.3389/fgene.2022.832668)
Supplement: Supplementary file 2 [file Table3.XLSX]

## Sheet: conidia
Table S3. GO classification of the crotonylated proteins.
GO Terms Level 1	GO Terms Level 2	No. of Protein	Protein IDs
Biological Process	metabolic process	1032	TERG_02658T0 TERG_06234T0 TERG_01169T0 TERG_00625T0 TERG_06969T0 TERG_01256T0 TERG_01052T0 TERG_00337T0 TERG_04437T0 TERG_04402T1 TERG_04542T1 TERG_05911T0 TERG_07337T0 TERG_05677T0 TERG_06922T0 TERG_07006T6 TERG_04145T1 TERG_01766T1 TERG_00823T0 TERG_01258T0 TERG_00250T0 TERG_01605T0 TERG_05504T0 TERG_04612T3 TERG_03339T0 TERG_01419T0 TERG_07116T0 TERG_04978T0 TERG_02966T0 TERG_00768T0 TERG_0439…
	cellular process	824	TERG_02658T0 TERG_12173T0 TERG_01169T0 TERG_06969T0 TERG_01256T0 TERG_07002T0 TERG_00337T0 TERG_04437T0 TERG_07643T0 TERG_04542T1 TERG_05911T0 TERG_08403T0 TERG_06840T0 TERG_07337T0 TERG_06922T0 TERG_05524T1 TERG_07006T6 TERG_04145T1 TERG_01766T1 TERG_05146T1 TERG_01258T0 TERG_04821T0 TERG_01605T0 TERG_04612T3 TERG_05304T0 TERG_01419T0 TERG_12172T0 TERG_03523T0 TERG_07735T0 TERG_02966T0 TERG_0076…
	single-organism process	655	TERG_00305T0 TERG_12173T0 TERG_07526T0 TERG_06234T0 TERG_06309T0 TERG_07643T0 TERG_04402T1 TERG_06840T0 TERG_06922T0 TERG_05524T1 TERG_04145T1 TERG_01258T0 TERG_04821T0 TERG_00919T0 TERG_01605T0 TERG_05504T0 TERG_04612T3 TERG_03339T0 TERG_05304T0 TERG_01419T0 TERG_12172T0 TERG_07116T0 TERG_00768T0 TERG_06306T0 TERG_07149T0 TERG_02897T0 TERG_00538T0 TERG_02559T0 TERG_04682T4 TERG_08244T0 TERG_0156…
	localization	191	TERG_05324T0 TERG_00556T0 TERG_00305T0 TERG_05861T0 TERG_08555T0 TERG_02508T0 TERG_01244T0 TERG_08655T0 TERG_07916T1 TERG_02709T0 TERG_01030T1 TERG_12154T0 TERG_06393T2 TERG_03151T0 TERG_04145T1 TERG_01258T0 TERG_06173T2 TERG_07729T0 TERG_06972T0 TERG_02020T1 TERG_04151T0 TERG_05549T0 TERG_00230T0 TERG_05391T0 TERG_06493T0 TERG_02558T0 TERG_03878T1 TERG_00605T2 TERG_03933T5 TERG_06262T0 TERG_0586…
	biological regulation	123	TERG_12262T0 TERG_06326T14 TERG_03511T0 TERG_04006T0 TERG_12335T0 TERG_07263T0 TERG_00012T0 TERG_11693T0 TERG_00015T0 TERG_07564T0 TERG_04413T0 TERG_04575T0 TERG_00024T1 TERG_00337T0 TERG_12585T0 TERG_00983T0 TERG_08534T0 TERG_08413T0 TERG_05455T0 TERG_07131T0 TERG_00906T0 TERG_06840T0 TERG_12584T0 TERG_05483T0 TERG_12154T0 TERG_06817T0 TERG_01716T0 TERG_02894T0 TERG_01866T0 TERG_12308T0 TERG_040…
	response to stimulus	78	TERG_12262T0 TERG_06326T14 TERG_03511T0 TERG_06963T0 TERG_04489T0 TERG_00024T1 TERG_04652T0 TERG_05911T0 TERG_07131T0 TERG_06840T0 TERG_12154T0 TERG_11666T0 TERG_01716T0 TERG_01463T0 TERG_08417T0 TERG_03548T0 TERG_01605T0 TERG_07867T4 TERG_07472T0 TERG_04151T0 TERG_02424T0 TERG_01122T0 TERG_11854T1 TERG_07507T1 TERG_03447T0 TERG_07237T5 TERG_00490T0 TERG_00768T0 TERG_06354T0 TERG_12719T0 TERG_070…
	cellular component organization or biogenesis	65	TERG_08637T0 TERG_03652T1 TERG_00077T0 TERG_07904T0 TERG_04413T0 TERG_00373T0 TERG_01475T0 TERG_04437T0 TERG_08413T0 TERG_07904T2 TERG_07154T0 TERG_07773T4 TERG_04572T0 TERG_02967T1 TERG_06825T0 TERG_03151T0 TERG_02496T0 TERG_01046T0 TERG_07729T0 TERG_02930T0 TERG_06946T1 TERG_06182T1 TERG_07809T0 TERG_01102T0 TERG_04800T0 TERG_02568T0 TERG_03068T0 TERG_02559T0 TERG_00641T0 TERG_00009T0 TERG_0508…
	other	48	TERG_03511T0 TERG_06326T14 TERG_12262T0 TERG_00024T1 TERG_07131T0 TERG_06840T0 TERG_12154T0 TERG_01716T0 TERG_01605T0 TERG_07867T4 TERG_04151T0 TERG_02424T0 TERG_07809T0 TERG_00768T0 TERG_07074T0 TERG_05567T0 TERG_00766T2 TERG_12367T0 TERG_02422T0 TERG_05071T0 TERG_06326T1 TERG_00925T0 TERG_08956T0 TERG_07986T0 TERG_01067T0 TERG_02472T1 TERG_00019T0 TERG_05753T1 TERG_12191T0 TERG_04471T0 TERG_055…
Molecular Function	binding	1117	TERG_02658T0 TERG_04045T0 TERG_01689T1 TERG_06969T0 TERG_00337T0 TERG_04437T0 TERG_04402T1 TERG_04542T1 TERG_07406T0 TERG_05911T0 TERG_02956T0 TERG_06922T0 TERG_07006T6 TERG_06203T0 TERG_04145T1 TERG_00250T0 TERG_02603T0 TERG_03063T0 TERG_02630T0 TERG_01419T0 TERG_07237T5 TERG_06475T3 TERG_02966T0 TERG_00768T0 TERG_04393T0 TERG_08278T0 TERG_07149T0 TERG_00538T0 TERG_02559T0 TERG_04628T0 TERG_0782…
	catalytic activity	1057	TERG_02658T0 TERG_04045T0 TERG_06308T2 TERG_06234T0 TERG_06969T0 TERG_01052T0 TERG_04437T0 TERG_04402T1 TERG_07406T0 TERG_05677T0 TERG_06922T0 TERG_07006T6 TERG_04145T1 TERG_00823T0 TERG_00250T0 TERG_01605T0 TERG_05504T0 TERG_04612T3 TERG_03339T0 TERG_01419T0 TERG_07116T0 TERG_04978T0 TERG_00768T0 TERG_08278T0 TERG_07149T0 TERG_00538T0 TERG_04628T0 TERG_07823T0 TERG_01273T0 TERG_08333T0 TERG_0116…
	structural molecule activity	100	TERG_06353T0 TERG_02237T0 TERG_00105T0 TERG_02858T0 TERG_00383T0 TERG_07904T0 TERG_02895T0 TERG_03605T0 TERG_01169T0 TERG_01256T0 TERG_07002T0 TERG_02604T0 TERG_07904T2 TERG_02404T0 TERG_01604T0 TERG_07773T4 TERG_07337T0 TERG_01952T1 TERG_00242T3 TERG_07385T0 TERG_05866T0 TERG_05283T0 TERG_01030T1 TERG_03738T0 TERG_02376T0 TERG_05183T0 TERG_01565T0 TERG_02971T0 TERG_07176T0 TERG_04772T0 TERG_0568…
	transporter activity	65	TERG_01616T1 TERG_06224T0 TERG_02508T0 TERG_03487T0 TERG_03818T0 TERG_08655T0 TERG_11016T0 TERG_07916T1 TERG_08056T0 TERG_04748T0 TERG_03472T0 TERG_04145T1 TERG_01258T0 TERG_06972T0 TERG_02020T1 TERG_05674T0 TERG_12246T0 TERG_07229T0 TERG_00215T0 TERG_04143T1 TERG_08613T0 TERG_05391T0 TERG_03878T1 TERG_00605T2 TERG_04323T0 TERG_03933T5 TERG_00142T0 TERG_05868T0 TERG_07747T0 TERG_02032T0 TERG_0618…
	other	87	TERG_12262T0 TERG_04006T0 TERG_12335T0 TERG_04609T1 TERG_00015T0 TERG_11693T0 TERG_07564T0 TERG_06224T0 TERG_12585T0 TERG_01379T0 TERG_05455T0 TERG_11016T0 TERG_07131T0 TERG_00906T0 TERG_06840T0 TERG_12584T0 TERG_08425T0 TERG_06817T0 TERG_02894T0 TERG_01463T0 TERG_04018T0 TERG_01605T0 TERG_07867T4 TERG_05504T0 TERG_03514T0 TERG_00086T0 TERG_08153T0 TERG_05479T0 TERG_04143T1 TERG_07507T1 TERG_0219…
Cellular Component	cell	485	TERG_00305T0 TERG_02237T0 TERG_12173T0 TERG_04380T0 TERG_07904T0 TERG_00063T0 TERG_01169T0 TERG_08555T0 TERG_01256T0 TERG_02752T0 TERG_07002T0 TERG_05356T0 TERG_07643T0 TERG_01604T0 TERG_04542T1 TERG_08655T0 TERG_06421T0 TERG_05455T0 TERG_07773T4 TERG_08403T0 TERG_02967T1 TERG_07337T0 TERG_01952T1 TERG_06817T0 TERG_01198T1 TERG_11937T0 TERG_01258T0 TERG_04030T0 TERG_04821T0 TERG_02930T0 TERG_0703…
	organelle	267	TERG_02237T0 TERG_07904T0 TERG_01169T0 TERG_08555T0 TERG_01256T0 TERG_02752T0 TERG_07002T0 TERG_07643T0 TERG_01604T0 TERG_08655T0 TERG_05455T0 TERG_07773T4 TERG_02967T1 TERG_07337T0 TERG_01952T1 TERG_06817T0 TERG_01198T1 TERG_11937T0 TERG_01258T0 TERG_04030T0 TERG_04821T0 TERG_02930T0 TERG_08213T0 TERG_05954T0 TERG_02630T0 TERG_06182T1 TERG_07735T0 TERG_04057T0 TERG_02966T0 TERG_06362T0 TERG_0439…
	macromolecular complex	254	TERG_00305T0 TERG_02237T0 TERG_12173T0 TERG_04380T0 TERG_02221T3 TERG_07904T0 TERG_01169T0 TERG_01675T0 TERG_00102T0 TERG_08555T0 TERG_01256T0 TERG_02752T0 TERG_07002T0 TERG_07643T0 TERG_07904T2 TERG_02404T0 TERG_01604T0 TERG_07773T4 TERG_07396T0 TERG_02967T1 TERG_12584T0 TERG_07337T0 TERG_01952T1 TERG_01030T1 TERG_08425T0 TERG_03151T0 TERG_04145T1 TERG_01046T0 TERG_02376T0 TERG_01258T0 TERG_0617…
	membrane	215	TERG_00556T0 TERG_00305T0 TERG_05861T0 TERG_08555T0 TERG_02508T0 TERG_02752T0 TERG_01244T0 TERG_07643T0 TERG_08655T0 TERG_07406T0 TERG_11016T0 TERG_07916T1 TERG_06840T0 TERG_02709T0 TERG_01030T1 TERG_12154T0 TERG_06543T3 TERG_06393T2 TERG_03151T0 TERG_04145T1 TERG_11937T0 TERG_01258T0 TERG_06173T2 TERG_06972T0 TERG_04821T0 TERG_02020T1 TERG_01370T0 TERG_01605T0 TERG_04151T0 TERG_05549T0 TERG_0429…
	other	24	TERG_08637T0 TERG_03276T0 TERG_02277T0 TERG_07564T0 TERG_12585T0 TERG_05039T1 TERG_07396T0 TERG_12584T0 TERG_01046T0 TERG_05590T0 TERG_08153T0 TERG_04393T0 TERG_02568T0 TERG_03248T1 TERG_03711T0 TERG_08193T0 TERG_08449T0 TERG_03260T0 TERG_02935T0 TERG_11628T0 TERG_04324T2 TERG_02618T0 TERG_01368T0 TERG_02482T0

## Sheet: mycelia
GO Terms Level 1	GO Terms Level 2	No. of Protein	Protein IDs
Biological Process	metabolic process	796	TERG_07526T0 TERG_07187T0 TERG_07262T1 TERG_06234T0 TERG_01169T0 TERG_00625T0 TERG_03843T1 TERG_01256T0 TERG_07002T0 TERG_01052T0 TERG_04437T0 TERG_07643T0 TERG_04402T1 TERG_04542T1 TERG_05911T0 TERG_03384T0 TERG_08403T0 TERG_06840T0 TERG_07337T0 TERG_05677T0 TERG_05524T1 TERG_04145T1 TERG_05146T1 TERG_01258T0 TERG_00250T0 TERG_04821T0 TERG_01564T1 TERG_08522T0 TERG_05504T0 TERG_03339T0 TERG_0141…
	cellular process	683	TERG_07187T0 TERG_07262T1 TERG_01169T0 TERG_01256T0 TERG_07002T0 TERG_04437T0 TERG_07643T0 TERG_04542T1 TERG_05911T0 TERG_03384T0 TERG_08403T0 TERG_06840T0 TERG_07337T0 TERG_05524T1 TERG_04145T1 TERG_05146T1 TERG_01258T0 TERG_04821T0 TERG_05856T0 TERG_01419T0 TERG_07735T0 TERG_06530T0 TERG_04393T0 TERG_07895T0 TERG_07149T0 TERG_00024T0 TERG_07823T0 TERG_08333T0 TERG_00247T0 TERG_12719T0 TERG_0788…
	single-organism process	515	TERG_00305T0 TERG_07526T0 TERG_07187T0 TERG_07262T1 TERG_06234T0 TERG_03843T1 TERG_07643T0 TERG_04402T1 TERG_03384T0 TERG_06840T0 TERG_05524T1 TERG_04145T1 TERG_01258T0 TERG_04821T0 TERG_01564T1 TERG_05504T0 TERG_03339T0 TERG_05856T0 TERG_01419T0 TERG_07116T0 TERG_06306T0 TERG_07149T0 TERG_00024T0 TERG_01560T0 TERG_08333T0 TERG_00247T0 TERG_04232T0 TERG_12719T0 TERG_07884T0 TERG_02020T0 TERG_0382…
	localization	153	TERG_00556T0 TERG_00305T0 TERG_05861T0 TERG_07585T1 TERG_08555T0 TERG_05470T2 TERG_00499T0 TERG_01244T0 TERG_08655T0 TERG_07916T1 TERG_06173T0 TERG_01030T1 TERG_12154T0 TERG_06212T0 TERG_04145T1 TERG_01258T0 TERG_02020T1 TERG_07729T0 TERG_04151T0 TERG_05856T0 TERG_05549T0 TERG_03933T5 TERG_06262T0 TERG_02304T0 TERG_00024T0 TERG_01512T0 TERG_01560T0 TERG_01090T0 TERG_07764T0 TERG_05776T0 TERG_0701…
	biological regulation	75	TERG_12335T0 TERG_00012T0 TERG_00015T0 TERG_07564T0 TERG_00111T0 TERG_01764T2 TERG_00983T0 TERG_06340T9 TERG_07131T0 TERG_00906T0 TERG_06840T0 TERG_12154T0 TERG_06817T0 TERG_12308T0 TERG_04030T0 TERG_02930T0 TERG_04151T0 TERG_02424T0 TERG_05954T0 TERG_07694T0 TERG_02089T0 TERG_02192T0 TERG_08218T0 TERG_11518T0 TERG_12122T0 TERG_02478T0 TERG_00024T0 TERG_06946T0 TERG_04662T0 TERG_12367T0 TERG_0556…
	cellular component organization or biogenesis	59	TERG_08637T0 TERG_03652T1 TERG_02218T0 TERG_00077T0 TERG_12523T0 TERG_07904T0 TERG_07786T0 TERG_00111T0 TERG_00373T0 TERG_01475T0 TERG_04437T0 TERG_03906T0 TERG_07904T2 TERG_06388T0 TERG_04690T0 TERG_06201T0 TERG_07773T4 TERG_04572T0 TERG_02967T1 TERG_03498T1 TERG_08256T0 TERG_02496T0 TERG_01046T0 TERG_01368T0 TERG_08497T0 TERG_07729T0 TERG_02930T0 TERG_07773T0 TERG_00814T1 TERG_05856T0 TERG_0618…
	response to stimulus	53	TERG_05071T0 TERG_02422T0 TERG_06963T0 TERG_08956T0 TERG_12329T0 TERG_07986T0 TERG_01764T2 TERG_01067T0 TERG_06340T9 TERG_04692T0 TERG_04652T0 TERG_05911T0 TERG_05753T1 TERG_05581T0 TERG_04471T0 TERG_07131T0 TERG_06840T0 TERG_12154T0 TERG_06097T0 TERG_06754T0 TERG_01187T0 TERG_11666T0 TERG_07578T0 TERG_01463T0 TERG_08417T0 TERG_08458T0 TERG_12124T0 TERG_07472T0 TERG_02762T0 TERG_04151T0 TERG_0134…
	other	31	TERG_02422T0 TERG_05071T0 TERG_08956T0 TERG_07986T0 TERG_01764T2 TERG_06340T9 TERG_01067T0 TERG_05753T1 TERG_05581T0 TERG_04471T0 TERG_07131T0 TERG_06840T0 TERG_12154T0 TERG_01187T0 TERG_06097T0 TERG_07578T0 TERG_12124T0 TERG_04151T0 TERG_02424T0 TERG_08542T0 TERG_07809T0 TERG_06326T7 TERG_00692T0 TERG_08218T0 TERG_01356T0 TERG_12122T0 TERG_00024T0 TERG_00705T0 TERG_04946T1 TERG_05567T0 TERG_1236…
Molecular Function	binding	889	TERG_00305T0 TERG_04360T0 TERG_04045T0 TERG_07262T1 TERG_03407T0 TERG_04437T0 TERG_03265T1 TERG_04402T1 TERG_03499T0 TERG_04542T1 TERG_05911T0 TERG_03384T0 TERG_08403T0 TERG_02956T0 TERG_04145T1 TERG_00250T0 TERG_01564T1 TERG_04258T0 TERG_02630T0 TERG_01419T0 TERG_07694T0 TERG_02601T0 TERG_07237T5 TERG_05382T0 TERG_06306T0 TERG_04393T0 TERG_07895T0 TERG_07149T0 TERG_02304T0 TERG_00024T0 TERG_0462…
	catalytic activity	782	TERG_04045T0 TERG_07526T0 TERG_07187T0 TERG_07262T1 TERG_03407T0 TERG_06308T2 TERG_06234T0 TERG_03843T1 TERG_01052T0 TERG_04437T0 TERG_04402T1 TERG_03384T0 TERG_08403T0 TERG_08529T2 TERG_06840T0 TERG_05677T0 TERG_06543T3 TERG_05524T1 TERG_04145T1 TERG_05146T1 TERG_05089T1 TERG_00250T0 TERG_01564T1 TERG_08522T0 TERG_05504T0 TERG_03339T0 TERG_04258T0 TERG_08213T0 TERG_01419T0 TERG_02601T0 TERG_0711…
	structural molecule activity	107	TERG_02237T0 TERG_00105T0 TERG_02858T0 TERG_00383T0 TERG_12523T0 TERG_07904T0 TERG_02895T0 TERG_01169T0 TERG_01256T0 TERG_07002T0 TERG_02604T0 TERG_01952T0 TERG_06577T0 TERG_07904T2 TERG_02404T0 TERG_01604T0 TERG_07773T4 TERG_07337T0 TERG_00242T3 TERG_07385T0 TERG_05866T0 TERG_05283T0 TERG_01030T1 TERG_04835T0 TERG_03738T0 TERG_02376T0 TERG_05183T0 TERG_01565T0 TERG_02971T0 TERG_07176T0 TERG_0477…
	transporter activity	57	TERG_01616T1 TERG_01443T3 TERG_06224T0 TERG_07143T0 TERG_00605T1 TERG_04400T0 TERG_05029T0 TERG_03487T0 TERG_03818T0 TERG_07800T0 TERG_08655T0 TERG_11016T0 TERG_07916T1 TERG_06344T1 TERG_02409T0 TERG_08056T0 TERG_04748T0 TERG_06157T4 TERG_06157T1 TERG_06212T0 TERG_03472T0 TERG_04145T1 TERG_00552T0 TERG_03336T0 TERG_06399T0 TERG_12247T0 TERG_01258T0 TERG_02020T1 TERG_07920T1 TERG_03553T0 TERG_1224…
	other	57	TERG_12335T0 TERG_07262T1 TERG_00015T0 TERG_00841T0 TERG_08956T0 TERG_07564T0 TERG_06224T0 TERG_07295T0 TERG_07800T0 TERG_03528T3 TERG_11628T0 TERG_04834T0 TERG_03872T0 TERG_02409T0 TERG_11016T0 TERG_05581T0 TERG_07131T0 TERG_00546T0 TERG_05090T3 TERG_00906T0 TERG_06840T0 TERG_08425T0 TERG_04490T0 TERG_06817T0 TERG_06097T0 TERG_06754T0 TERG_00679T0 TERG_06817T1 TERG_01463T0 TERG_04018T0 TERG_0136…
Cellular Component	cell	424	TERG_00305T0 TERG_02237T0 TERG_04380T0 TERG_07904T0 TERG_00063T0 TERG_01169T0 TERG_08555T0 TERG_01256T0 TERG_07002T0 TERG_03906T0 TERG_07643T0 TERG_06577T0 TERG_01604T0 TERG_04542T1 TERG_08655T0 TERG_06421T0 TERG_07773T4 TERG_08403T0 TERG_06173T0 TERG_02967T1 TERG_01793T0 TERG_07337T0 TERG_06817T0 TERG_11937T0 TERG_01258T0 TERG_04030T0 TERG_04821T0 TERG_02930T0 TERG_05856T0 TERG_08213T0 TERG_0595…
	organelle	248	TERG_08637T0 TERG_02237T0 TERG_07904T0 TERG_01169T0 TERG_00111T0 TERG_08555T0 TERG_01256T0 TERG_07002T0 TERG_03906T0 TERG_07643T0 TERG_05039T1 TERG_06577T0 TERG_07904T2 TERG_06789T2 TERG_02404T0 TERG_01604T0 TERG_08655T0 TERG_07773T4 TERG_07396T0 TERG_06173T0 TERG_02967T1 TERG_01793T0 TERG_07337T0 TERG_01030T1 TERG_06817T0 TERG_03498T1 TERG_07882T0 TERG_01046T0 TERG_11937T0 TERG_02376T0 TERG_0125…
	macromolecular complex	243	TERG_00305T0 TERG_02237T0 TERG_04380T0 TERG_02221T3 TERG_07904T0 TERG_01169T0 TERG_00111T0 TERG_00102T0 TERG_08555T0 TERG_01256T0 TERG_07002T0 TERG_06096T0 TERG_03906T0 TERG_07643T0 TERG_06577T0 TERG_07904T2 TERG_02404T0 TERG_01604T0 TERG_07773T4 TERG_07396T0 TERG_06173T0 TERG_02967T1 TERG_07337T0 TERG_01030T1 TERG_08425T0 TERG_07882T0 TERG_01046T0 TERG_04145T1 TERG_02376T0 TERG_01258T0 TERG_0202…
	membrane	185	TERG_00556T0 TERG_00305T0 TERG_05861T0 TERG_07585T1 TERG_08555T0 TERG_05470T2 TERG_01244T0 TERG_07643T0 TERG_08655T0 TERG_11016T0 TERG_07916T1 TERG_07271T0 TERG_06840T0 TERG_06173T0 TERG_01030T1 TERG_06543T3 TERG_12154T0 TERG_06212T0 TERG_04145T1 TERG_11937T0 TERG_01258T0 TERG_12462T0 TERG_02020T1 TERG_04821T0 TERG_01370T0 TERG_04151T0 TERG_02266T0 TERG_08721T0 TERG_05856T0 TERG_05549T0 TERG_0429…
	other	15	TERG_08637T0 TERG_07601T0 TERG_07564T0 TERG_05039T1 TERG_11628T0 TERG_07396T0 TERG_02618T0 TERG_04835T0 TERG_01368T0 TERG_01046T0 TERG_05590T0 TERG_04393T0 TERG_02568T0 TERG_05340T0 TERG_07105T0
