# Supplementary material for: Proteome-Wide Identification and Functional Analysis of Lysine Crotonylation in Trichophyton rubrum Conidial and Mycelial Stages
Source: Front Genet. 2022 Mar 10;13:832668. doi: 10.3389/fgene.2022.832668 (PMC8960058; doi:10.3389/fgene.2022.832668)
Supplement: Supplementary file 6 [file Table4.XLSX]

## Sheet: conidia
Table S4. Subcellular location analysis of the crotonylated proteins.
Subcellular location	No. of protein	Protein IDs
nuclear	865	TERG_00305T0 TERG_02658T0 TERG_04045T0 TERG_00688T2 TERG_01689T1 TERG_05878T0 TERG_06969T0 TERG_05930T1 TERG_01256T0 TERG_04437T0 TERG_04289T0 TERG_07643T0 TERG_05440T0 TERG_03265T1 TERG_01379T0 TERG_07444T1 TERG_05432T0 TERG_08529T2 TERG_02709T0 TERG_07881T0 TERG_02956T0 TERG_03663T0 TERG_07006T6 TERG_02345T0 TERG_11937T0 TERG_05146T1 TERG_04821T0 TERG_06710T0 TERG_01605T0 TERG_02603T0 TERG_0550…
plasma membrane	155	TERG_00556T0 TERG_08854T0 TERG_07201T0 TERG_05761T0 TERG_08237T0 TERG_01551T0 TERG_02508T0 TERG_12535T0 TERG_01641T1 TERG_00253T0 TERG_06594T0 TERG_00022T0 TERG_02281T0 TERG_07916T1 TERG_01016T0 TERG_06543T3 TERG_00919T0 TERG_05549T0 TERG_04258T0 TERG_05391T0 TERG_04845T0 TERG_01907T1 TERG_00605T2 TERG_03933T5 TERG_01566T0 TERG_00768T0 TERG_08383T1 TERG_05868T0 TERG_05641T0 TERG_03843T3 TERG_0339…
cytosol	695	TERG_05281T0 TERG_00337T0 TERG_04402T1 TERG_06505T0 TERG_08403T0 TERG_06840T0 TERG_12633T0 TERG_05634T1 TERG_06922T0 TERG_08234T0 TERG_06203T0 TERG_00823T0 TERG_06009T0 TERG_00250T0 TERG_04612T3 TERG_01120T0 TERG_08213T0 TERG_05304T0 TERG_01816T0 TERG_12172T0 TERG_02601T0 TERG_07237T5 TERG_05690T4 TERG_07116T0 TERG_04921T0 TERG_04393T0 TERG_02180T0 TERG_00538T0 TERG_06405T0 TERG_06304T0 TERG_0485…
mitochondria	647	TERG_00254T0 TERG_12173T0 TERG_00618T0 TERG_07526T0 TERG_06308T2 TERG_06516T0 TERG_01169T0 TERG_08555T0 TERG_07002T0 TERG_01052T0 TERG_05911T0 TERG_07337T0 TERG_05677T0 TERG_03418T1 TERG_05524T1 TERG_04145T1 TERG_01766T1 TERG_01258T0 TERG_08522T0 TERG_03339T0 TERG_12062T0 TERG_02630T0 TERG_01419T0 TERG_07058T1 TERG_07735T0 TERG_06306T0 TERG_07895T0 TERG_07149T0 TERG_04682T4 TERG_07807T0 TERG_0091…
extracellular	152	TERG_02001T0 TERG_07054T0 TERG_06494T0 TERG_06986T0 TERG_00625T0 TERG_01617T0 TERG_03402T0 TERG_04445T0 TERG_08531T0 TERG_11814T0 TERG_07406T0 TERG_02242T0 TERG_08314T0 TERG_00989T0 TERG_08969T0 TERG_05652T0 TERG_03231T0 TERG_06547T0 TERG_00583T0 TERG_04299T0 TERG_06475T3 TERG_05897T0 TERG_04978T0 TERG_06242T0 TERG_05522T1 TERG_02897T0 TERG_05303T4 TERG_01273T0 TERG_12719T0 TERG_01606T0 TERG_0852…
cytoskeleton	91	TERG_06781T0 TERG_06570T0 TERG_12406T0 TERG_05518T0 TERG_04303T2 TERG_06637T1 TERG_07904T0 TERG_04413T0 TERG_06309T0 TERG_00289T0 TERG_12585T0 TERG_07904T2 TERG_02615T0 TERG_01643T1 TERG_12584T0 TERG_00355T2 TERG_05305T0 TERG_05286T0 TERG_02971T0 TERG_02870T0 TERG_07241T1 TERG_04475T2 TERG_06045T0 TERG_02367T0 TERG_04916T0 TERG_05904T0 TERG_02192T0 TERG_06666T1 TERG_03811T1 TERG_00808T0 TERG_0464…
cytosol, nuclear	129	TERG_03362T0 TERG_06337T0 TERG_01198T0 TERG_01244T0 TERG_05039T1 TERG_04542T1 TERG_03360T0 TERG_01940T0 TERG_03244T0 TERG_02166T0 TERG_08101T0 TERG_07621T0 TERG_12405T0 TERG_07524T0 TERG_00739T0 TERG_03734T0 TERG_01078T1 TERG_03063T0 TERG_03592T0 TERG_02113T0 TERG_02391T0 TERG_07823T0 TERG_05263T1 TERG_04570T0 TERG_01662T0 TERG_04701T0 TERG_03211T1 TERG_05300T0 TERG_06012T0 TERG_05071T0 TERG_0547…
peroxisome	9	TERG_05012T0 TERG_01281T0 TERG_08195T1 TERG_01832T0 TERG_01800T1 TERG_01901T1 TERG_02005T0 TERG_01771T0 TERG_01463T0
endoplasmic reticulum	3	TERG_02172T0 TERG_01573T0 TERG_05883T1
cytosol, mitochondria	12	TERG_05923T0 TERG_05630T0 TERG_06735T0 TERG_06234T0 TERG_07973T0 TERG_11934T0 TERG_07890T0 TERG_08355T0 TERG_03269T0 TERG_03792T0 TERG_04576T0 TERG_03633T0
cytosol, peroxisome	3	TERG_12107T0 TERG_07300T0 TERG_04180T0
mitochondria, nuclear	2	TERG_05617T1 TERG_07889T0
Golgi apparatus	1	TERG_05005T3

## Sheet: mycelia
Subcellular location	No. of protein	Protein IDs
cytosol	509	TERG_01555T0 TERG_00818T0 TERG_06568T0 TERG_04380T0 TERG_03414T0 TERG_07629T0 TERG_07262T1 TERG_02535T0 TERG_04333T0 TERG_04402T1 TERG_03395T0 TERG_06421T0 TERG_07773T4 TERG_06505T0 TERG_08403T0 TERG_06840T0 TERG_12633T0 TERG_01163T0 TERG_05634T1 TERG_00124T0 TERG_03017T2 TERG_08234T0 TERG_07905T0 TERG_00250T0 TERG_05311T0 TERG_01564T1 TERG_07127T0 TERG_01120T0 TERG_08213T0 TERG_05954T0 TERG_0665…
mitochondria	495	TERG_02237T0 TERG_04360T0 TERG_02176T0 TERG_07526T0 TERG_00015T0 TERG_06308T2 TERG_06516T0 TERG_01169T0 TERG_00893T1 TERG_07605T0 TERG_08555T0 TERG_07002T0 TERG_01052T0 TERG_01347T0 TERG_03499T0 TERG_06577T0 TERG_07318T0 TERG_08655T0 TERG_05911T0 TERG_04056T0 TERG_04838T0 TERG_07337T0 TERG_05677T0 TERG_03418T1 TERG_06817T0 TERG_05524T1 TERG_08519T0 TERG_04145T1 TERG_03727T0 TERG_01258T0 TERG_0852…
nuclear	581	TERG_00305T0 TERG_04045T0 TERG_05812T0 TERG_02640T0 TERG_01256T0 TERG_04437T0 TERG_03265T1 TERG_07643T0 TERG_05440T0 TERG_07444T1 TERG_08529T2 TERG_02956T0 TERG_11937T0 TERG_05146T1 TERG_04821T0 TERG_05504T0 TERG_07694T0 TERG_01447T0 TERG_02035T0 TERG_05382T0 TERG_07474T0 TERG_06530T0 TERG_02304T0 TERG_08456T1 TERG_07932T0 TERG_05803T0 TERG_08430T0 TERG_07958T0 TERG_01400T0 TERG_06497T0 TERG_0469…
plasma membrane	113	TERG_01616T1 TERG_00556T0 TERG_12335T0 TERG_06396T0 TERG_07187T0 TERG_08854T0 TERG_01443T3 TERG_05761T0 TERG_04535T0 TERG_08237T0 TERG_03843T1 TERG_01241T0 TERG_12535T0 TERG_07070T0 TERG_03487T0 TERG_00253T0 TERG_01127T2 TERG_12157T0 TERG_07916T1 TERG_04900T0 TERG_06173T0 TERG_01016T0 TERG_05717T0 TERG_06543T3 TERG_06212T0 TERG_08170T0 TERG_03420T0 TERG_12462T0 TERG_05549T0 TERG_04258T0 TERG_0722…
cytosol, nuclear	97	TERG_03155T0 TERG_00865T2 TERG_05569T2 TERG_00383T0 TERG_03362T0 TERG_02895T0 TERG_02065T0 TERG_06435T1 TERG_05485T3 TERG_01244T0 TERG_05039T1 TERG_01624T0 TERG_04542T1 TERG_07181T1 TERG_05730T0 TERG_04748T0 TERG_03360T0 TERG_05782T0 TERG_03244T0 TERG_02486T0 TERG_02166T0 TERG_06964T0 TERG_07621T0 TERG_04000T0 TERG_12405T0 TERG_05089T1 TERG_07524T0 TERG_00739T0 TERG_00816T0 TERG_03734T0 TERG_0389…
cytoskeleton	51	TERG_06015T0 TERG_03064T1 TERG_12406T0 TERG_03288T0 TERG_06637T1 TERG_06423T1 TERG_07904T0 TERG_02854T0 TERG_07986T0 TERG_07485T2 TERG_00946T0 TERG_03906T0 TERG_07904T2 TERG_05753T1 TERG_00089T0 TERG_03384T0 TERG_06481T0 TERG_06157T4 TERG_02240T1 TERG_07667T0 TERG_07235T0 TERG_06423T0 TERG_00972T0 TERG_06888T0 TERG_06907T0 TERG_02971T0 TERG_12352T3 TERG_07241T1 TERG_06652T0 TERG_01974T0 TERG_0381…
extracellular	83	TERG_07054T0 TERG_06494T0 TERG_06308T1 TERG_12523T0 TERG_03407T0 TERG_07959T0 TERG_00625T0 TERG_07041T0 TERG_07585T1 TERG_07527T0 TERG_07421T0 TERG_01305T4 TERG_11814T0 TERG_08255T1 TERG_07385T0 TERG_08561T0 TERG_03738T0 TERG_02811T0 TERG_02671T0 TERG_05576T0 TERG_01126T0 TERG_04251T0 TERG_02266T0 TERG_07640T7 TERG_05856T0 TERG_07126T0 TERG_04299T0 TERG_08201T2 TERG_05522T2 TERG_05335T0 TERG_0229…
peroxisome	5	TERG_01800T1 TERG_02909T0 TERG_01901T1 TERG_01463T0 TERG_01832T0
endoplasmic reticulum	5	TERG_02172T0 TERG_01573T0 TERG_07887T0 TERG_05883T1 TERG_03062T0
cytosol, mitochondria	10	TERG_05923T0 TERG_05630T0 TERG_06735T0 TERG_06234T0 TERG_07973T0 TERG_08355T0 TERG_03269T0 TERG_03792T0 TERG_04576T0 TERG_03633T0
cytosol, peroxisome	2	TERG_06116T0 TERG_04180T0
mitochondria, nuclear	2	TERG_11010T0 TERG_07889T0
Golgi apparatus	1	TERG_05005T3
