# Supplementary material for: Proteome-Wide Identification and Functional Analysis of Lysine Crotonylation in Trichophyton rubrum Conidial and Mycelial Stages
Source: Front Genet. 2022 Mar 10;13:832668. doi: 10.3389/fgene.2022.832668 (PMC8960058; doi:10.3389/fgene.2022.832668)
Supplement: Supplementary file 8 [file Table5.XLSX]

## Sheet: conidia
Table S5. GO enrichment of the crotonylated proteins.
GO Terms Level 1	GO Terms Description	GO Terms Level	GO Terms ID	Mapping	Background	All Mapping	All Background	Fold Enrichment	Fisher' exact test P value	-log10(p value)	Related Protein
Biological Process	translation	7	GO:0006412	139	215	1329	3777	1.84	1.30185e-19	18.89	TERG_02237T0 TERG_00077T0 TERG_00063T0 TERG_01169T0 TERG_01256T0 TERG_07002T0 TERG_01604T0 TERG_02404T0 TERG_04542T1 TERG_01952T1 TERG_07337T0 TERG_02376T0 TERG_07038T1 TERG_06275T0 TERG_04897T1 TERG_06454T0 TERG_06958T0 TERG_06917T0 TERG_06453T0 TERG_04057T0 TERG_07735T0 TERG_05236T1 TERG_01045T1 TERG_06362T0 TERG_01892T0 TERG_06218T0 TERG_07038T0 TERG_00462T0 TERG_03080T0 TERG_03050T0 TERG_0403…
	small molecule metabolic process	4	GO:0044281	253	473	1329	3777	1.52	2.17058e-18	17.66	TERG_00231T0 TERG_08261T2 TERG_06568T0 TERG_03414T0 TERG_03352T0 TERG_00063T0 TERG_02535T0 TERG_00102T0 TERG_07605T0 TERG_02752T0 TERG_02768T1 TERG_01446T0 TERG_04445T0 TERG_07643T0 TERG_04477T0 TERG_05251T1 TERG_05679T0 TERG_06744T0 TERG_08887T0 TERG_00989T0 TERG_04752T0 TERG_06922T0 TERG_04363T0 TERG_05524T1 TERG_05989T0 TERG_04145T1 TERG_01258T0 TERG_07905T0 TERG_02020T1 TERG_00074T0 TERG_0611…
	cellular amino acid metabolic process	8	GO:0006520	119	214	1329	3777	1.58	2.67294e-10	9.57	TERG_07966T0 TERG_05184T0 TERG_08261T2 TERG_04470T0 TERG_06568T0 TERG_07518T0 TERG_00063T0 TERG_07605T0 TERG_07611T0 TERG_04198T0 TERG_08660T0 TERG_05419T0 TERG_01892T1 TERG_04445T0 TERG_04811T0 TERG_06909T0 TERG_00989T0 TERG_06922T0 TERG_04363T0 TERG_05524T1 TERG_01033T0 TERG_07905T0 TERG_03050T1 TERG_06843T0 TERG_07127T0 TERG_07038T1 TERG_04612T3 TERG_01419T0 TERG_05781T0 TERG_03656T0 TERG_0475…
	nucleobase-containing small molecule metabolic process	6	GO:0055086	77	134	1329	3777	1.63	7.02857e-08	7.15	TERG_06640T1 TERG_04392T0 TERG_04336T0 TERG_00498T0 TERG_06846T0 TERG_02535T0 TERG_01905T0 TERG_05690T2 TERG_02752T0 TERG_02768T1 TERG_08660T0 TERG_01446T0 TERG_07643T0 TERG_07434T0 TERG_08056T0 TERG_08887T0 TERG_06221T1 TERG_04752T0 TERG_02454T0 TERG_03472T0 TERG_05989T0 TERG_03729T0 TERG_04145T1 TERG_08302T0 TERG_01258T0 TERG_02020T1 TERG_06119T0 TERG_00184T0 TERG_01419T0 TERG_05439T0 TERG_0467…
	nucleoside phosphate metabolic process	7	GO:0006753	66	118	1329	3777	1.59	2.34354e-06	5.63	TERG_06640T1 TERG_04392T0 TERG_04336T0 TERG_00498T0 TERG_06846T0 TERG_02535T0 TERG_01905T0 TERG_02752T0 TERG_02768T1 TERG_08660T0 TERG_01446T0 TERG_07643T0 TERG_07434T0 TERG_08056T0 TERG_06221T1 TERG_04752T0 TERG_02454T0 TERG_03472T0 TERG_03729T0 TERG_05989T0 TERG_04145T1 TERG_08302T0 TERG_01258T0 TERG_02020T1 TERG_06119T0 TERG_00184T0 TERG_05439T0 TERG_04677T0 TERG_04195T0 TERG_07747T0 TERG_0203…
	nucleotide metabolic process	8	GO:0009117	62	111	1329	3777	1.59	5.07002e-06	5.29	TERG_06640T1 TERG_04392T0 TERG_06640T2 TERG_04336T0 TERG_07080T0 TERG_00498T0 TERG_06846T0 TERG_02535T0 TERG_07503T0 TERG_01524T1 TERG_02752T0 TERG_02768T1 TERG_08660T0 TERG_01446T0 TERG_07643T0 TERG_04858T0 TERG_03389T0 TERG_07434T0 TERG_08056T0 TERG_06221T1 TERG_07885T0 TERG_06157T1 TERG_04553T0 TERG_03048T0 TERG_04752T0 TERG_04490T0 TERG_03784T0 TERG_02454T0 TERG_03472T0 TERG_03729T0 TERG_0598…
	purine-containing compound metabolic process	5	GO:0072521	39	62	1329	3777	1.79	6.84275e-06	5.16	TERG_06640T1 TERG_04392T0 TERG_06640T2 TERG_07080T0 TERG_06846T0 TERG_07503T0 TERG_02752T0 TERG_01446T0 TERG_07643T0 TERG_00631T0 TERG_07434T0 TERG_08056T0 TERG_08887T0 TERG_07885T0 TERG_06157T1 TERG_03048T0 TERG_04490T0 TERG_03472T0 TERG_05989T0 TERG_04145T1 TERG_01258T0 TERG_02020T1 TERG_03553T0 TERG_05222T0 TERG_02343T0 TERG_02416T0 TERG_04036T0 TERG_04677T0 TERG_04139T0 TERG_07747T0 TERG_0203…
	ribose phosphate metabolic process	6	GO:0019693	39	64	1329	3777	1.73	2.03296e-05	4.69	TERG_06640T1 TERG_04392T0 TERG_06640T2 TERG_04336T0 TERG_07080T0 TERG_02768T1 TERG_02752T0 TERG_01446T0 TERG_07643T0 TERG_04858T0 TERG_03389T0 TERG_08056T0 TERG_07885T0 TERG_06157T1 TERG_03048T0 TERG_04490T0 TERG_03472T0 TERG_03729T0 TERG_05989T0 TERG_04145T1 TERG_02728T0 TERG_08302T0 TERG_01258T0 TERG_02020T1 TERG_06119T0 TERG_03553T0 TERG_02343T0 TERG_04139T0 TERG_07747T0 TERG_02032T0 TERG_0618…
	nucleoside phosphate biosynthetic process	8	GO:1901293	45	77	1329	3777	1.66	2.19118e-05	4.66	TERG_06640T1 TERG_04392T0 TERG_06640T2 TERG_00498T0 TERG_06846T0 TERG_02535T0 TERG_01905T0 TERG_07503T0 TERG_08660T0 TERG_01446T0 TERG_04858T0 TERG_03389T0 TERG_07434T0 TERG_08056T0 TERG_06221T1 TERG_07885T0 TERG_06157T1 TERG_04553T0 TERG_03048T0 TERG_04752T0 TERG_03784T0 TERG_03472T0 TERG_05989T0 TERG_04145T1 TERG_01258T0 TERG_02020T1 TERG_03896T1 TERG_00184T0 TERG_01747T0 TERG_03896T0 TERG_0586…
	nucleotide biosynthetic process	9	GO:0009165	44	76	1329	3777	1.65	3.73393e-05	4.43	TERG_06640T1 TERG_04392T0 TERG_06640T2 TERG_00498T0 TERG_06846T0 TERG_02535T0 TERG_07503T0 TERG_08660T0 TERG_01446T0 TERG_04858T0 TERG_03389T0 TERG_07434T0 TERG_08056T0 TERG_06221T1 TERG_07885T0 TERG_06157T1 TERG_04553T0 TERG_03048T0 TERG_04752T0 TERG_03784T0 TERG_03472T0 TERG_05989T0 TERG_04145T1 TERG_01258T0 TERG_02020T1 TERG_03896T1 TERG_00184T0 TERG_01747T0 TERG_03896T0 TERG_05860T2 TERG_0234…
	purine-containing compound biosynthetic process	6	GO:0072522	31	49	1329	3777	1.8	5.1872e-05	4.29	TERG_06640T1 TERG_04392T0 TERG_06640T2 TERG_05222T0 TERG_06846T0 TERG_07503T0 TERG_02343T0 TERG_02416T0 TERG_04036T0 TERG_01446T0 TERG_04139T0 TERG_07434T0 TERG_02032T0 TERG_08056T0 TERG_08887T0 TERG_06183T0 TERG_07885T0 TERG_06157T1 TERG_04130T1 TERG_03048T0 TERG_04558T0 TERG_01975T0 TERG_03472T0 TERG_05989T0 TERG_04145T1 TERG_06128T0 TERG_03444T0 TERG_06491T0 TERG_01258T0 TERG_02020T0 TERG_0202…
	alpha-amino acid metabolic process	9	GO:1901605	59	111	1329	3777	1.51	6.33665e-05	4.2	TERG_05184T0 TERG_07313T0 TERG_08261T2 TERG_06568T0 TERG_07765T0 TERG_07922T0 TERG_08660T0 TERG_05419T0 TERG_04445T0 TERG_00584T0 TERG_00691T0 TERG_11628T0 TERG_04811T0 TERG_05631T0 TERG_00068T0 TERG_06922T0 TERG_03598T2 TERG_04363T0 TERG_02031T0 TERG_02728T0 TERG_07905T0 TERG_07588T1 TERG_04648T0 TERG_07127T0 TERG_08428T0 TERG_07187T2 TERG_07457T0 TERG_07826T0 TERG_00976T0 TERG_04751T1 TERG_0787…
	purine nucleotide metabolic process	9	GO:0006163	35	58	1329	3777	1.71	7.23747e-05	4.14	TERG_06640T1 TERG_04392T0 TERG_06640T2 TERG_07080T0 TERG_06846T0 TERG_07503T0 TERG_02752T0 TERG_01446T0 TERG_07643T0 TERG_07434T0 TERG_08056T0 TERG_07885T0 TERG_06157T1 TERG_03048T0 TERG_04490T0 TERG_03472T0 TERG_05989T0 TERG_04145T1 TERG_01258T0 TERG_02020T1 TERG_03553T0 TERG_02343T0 TERG_02416T0 TERG_04677T0 TERG_04139T0 TERG_07747T0 TERG_02032T0 TERG_06183T0 TERG_04130T1 TERG_04558T0 TERG_0197…
	nucleoside metabolic process	7	GO:0009116	34	56	1329	3777	1.73	7.70326e-05	4.11	TERG_04392T0 TERG_05690T2 TERG_02752T0 TERG_01446T0 TERG_07643T0 TERG_00089T0 TERG_04858T0 TERG_03389T0 TERG_08056T0 TERG_08887T0 TERG_06157T1 TERG_04490T0 TERG_04752T0 TERG_03472T0 TERG_04145T1 TERG_01258T0 TERG_02100T0 TERG_02020T1 TERG_03553T0 TERG_05690T1 TERG_05222T0 TERG_02343T0 TERG_04036T0 TERG_04139T0 TERG_07747T0 TERG_02032T0 TERG_06183T0 TERG_04130T1 TERG_04558T0 TERG_01975T0 TERG_0565…
Molecular Function	structural constituent of ribosome	3	GO:0003735	85	125	1802	5039	1.9	1.20916e-13	12.92	TERG_02237T0 TERG_06353T0 TERG_00105T0 TERG_00383T0 TERG_02858T0 TERG_02895T0 TERG_03605T0 TERG_01169T0 TERG_01256T0 TERG_07002T0 TERG_02604T0 TERG_01604T0 TERG_02404T0 TERG_00242T3 TERG_01952T1 TERG_07337T0 TERG_05283T0 TERG_05866T0 TERG_07385T0 TERG_03738T0 TERG_02376T0 TERG_05183T0 TERG_02971T0 TERG_04772T0 TERG_07176T0 TERG_05685T0 TERG_06275T0 TERG_07944T0 TERG_05825T0 TERG_00650T1 TERG_0645…
	structural molecule activity	2	GO:0005198	100	160	1802	5039	1.75	2.56813e-12	11.59	TERG_02237T0 TERG_06353T0 TERG_00105T0 TERG_00383T0 TERG_02858T0 TERG_07904T0 TERG_02895T0 TERG_03605T0 TERG_01169T0 TERG_01256T0 TERG_07002T0 TERG_02604T0 TERG_01604T0 TERG_07904T2 TERG_02404T0 TERG_07773T4 TERG_00242T3 TERG_01952T1 TERG_07337T0 TERG_01030T1 TERG_05283T0 TERG_05866T0 TERG_07385T0 TERG_03738T0 TERG_02376T0 TERG_01565T0 TERG_05183T0 TERG_02971T0 TERG_04772T0 TERG_07176T0 TERG_0389…
	RNA binding	5	GO:0003723	105	184	1802	5039	1.6	1.63922e-09	8.79	TERG_11751T0 TERG_03155T0 TERG_04893T0 TERG_06219T0 TERG_00077T0 TERG_04737T0 TERG_03362T0 TERG_02895T0 TERG_06140T0 TERG_03605T0 TERG_07192T0 TERG_00983T0 TERG_04437T0 TERG_02604T0 TERG_05039T1 TERG_02404T0 TERG_04542T1 TERG_02967T1 TERG_01952T1 TERG_05866T0 TERG_08045T0 TERG_04920T0 TERG_05183T0 TERG_07729T0 TERG_08179T0 TERG_06843T0 TERG_08429T4 TERG_04771T0 TERG_08432T0 TERG_04897T1 TERG_0780…
	lyase activity	3	GO:0016829	53	85	1802	5039	1.74	4.48068e-07	6.35	TERG_06208T0 TERG_00231T0 TERG_06890T0 TERG_08261T2 TERG_07616T0 TERG_03352T0 TERG_00102T0 TERG_04445T0 TERG_00691T0 TERG_11639T0 TERG_03389T0 TERG_01269T0 TERG_11586T0 TERG_04811T0 TERG_06744T0 TERG_06103T0 TERG_03048T0 TERG_02196T0 TERG_05631T0 TERG_05305T0 TERG_02454T0 TERG_05989T0 TERG_00537T0 TERG_03804T1 TERG_01076T0 TERG_07350T0 TERG_01271T0 TERG_01142T0 TERG_07559T1 TERG_07826T0 TERG_0530…
	isomerase activity	3	GO:0016853	42	64	1802	5039	1.84	9.83212e-07	6.01	TERG_03435T1 TERG_01843T0 TERG_01891T0 TERG_08274T0 TERG_03144T0 TERG_01475T0 TERG_03226T0 TERG_00187T0 TERG_01624T0 TERG_02182T0 TERG_02533T0 TERG_06655T0 TERG_01573T0 TERG_03427T0 TERG_08502T0 TERG_02590T0 TERG_05958T0 TERG_00342T1 TERG_04856T0 TERG_08302T0 TERG_00250T0 TERG_03896T1 TERG_08179T0 TERG_05527T0 TERG_07826T0 TERG_05954T0 TERG_03896T0 TERG_06182T1 TERG_02601T0 TERG_01800T1 TERG_0034…
	carbon-carbon lyase activity	4	GO:0016830	22	30	1802	5039	2.05	2.9617e-05	4.53	TERG_00231T0 TERG_08261T2 TERG_07616T0 TERG_07826T0 TERG_03352T0 TERG_11639T0 TERG_03389T0 TERG_11505T0 TERG_11586T0 TERG_07150T0 TERG_11647T0 TERG_11506T0 TERG_06744T0 TERG_11637T0 TERG_06103T0 TERG_02454T0 TERG_01339T0 TERG_03444T0 TERG_06688T0 TERG_08105T0 TERG_01271T0 TERG_00280T0
	aminoacyl-tRNA ligase activity	6	GO:0004812	32	53	1802	5039	1.69	0.000211256	3.68	TERG_03050T1 TERG_00461T1 TERG_06843T0 TERG_07966T0 TERG_07038T1 TERG_04470T0 TERG_00363T0 TERG_06612T0 TERG_05781T0 TERG_03656T0 TERG_07518T0 TERG_00063T0 TERG_07896T0 TERG_06454T0 TERG_04967T0 TERG_00461T7 TERG_06958T0 TERG_04198T0 TERG_01892T1 TERG_01045T1 TERG_02324T0 TERG_01892T0 TERG_01112T0 TERG_07038T0 TERG_01921T0 TERG_08589T0 TERG_08876T0 TERG_01033T0 TERG_06907T0 TERG_03080T0 TERG_0470…
	ligase activity, forming aminoacyl-tRNA and related compounds	5	GO:0016876	32	53	1802	5039	1.69	0.000211256	3.68	TERG_03050T1 TERG_00461T1 TERG_06843T0 TERG_07966T0 TERG_07038T1 TERG_04470T0 TERG_00363T0 TERG_06612T0 TERG_05781T0 TERG_03656T0 TERG_07518T0 TERG_00063T0 TERG_07896T0 TERG_06454T0 TERG_04967T0 TERG_00461T7 TERG_06958T0 TERG_04198T0 TERG_01892T1 TERG_01045T1 TERG_02324T0 TERG_01892T0 TERG_01112T0 TERG_07038T0 TERG_01921T0 TERG_08589T0 TERG_08876T0 TERG_01033T0 TERG_06907T0 TERG_03080T0 TERG_0470…
Cellular Component	cytoplasm	6	GO:0005737	277	501	610	1865	1.69	4.60274e-35	34.34	TERG_02237T0 TERG_12173T0 TERG_00063T0 TERG_01169T0 TERG_01256T0 TERG_02752T0 TERG_07002T0 TERG_07643T0 TERG_01604T0 TERG_04542T1 TERG_08655T0 TERG_06421T0 TERG_08403T0 TERG_01952T1 TERG_07337T0 TERG_06817T0 TERG_01258T0 TERG_04821T0 TERG_07038T1 TERG_05954T0 TERG_08213T0 TERG_12172T0 TERG_06666T1 TERG_04057T0 TERG_07735T0 TERG_06362T0 TERG_07823T0 TERG_01560T0 TERG_07540T0 TERG_02020T0 TERG_0625…
	macromolecular complex	2	GO:0032991	254	503	610	1865	1.54	1.23012e-22	21.91	TERG_00305T0 TERG_02237T0 TERG_12173T0 TERG_04380T0 TERG_02221T3 TERG_07904T0 TERG_01169T0 TERG_01675T0 TERG_00102T0 TERG_01256T0 TERG_08555T0 TERG_02752T0 TERG_07002T0 TERG_07643T0 TERG_01604T0 TERG_07904T2 TERG_02404T0 TERG_07396T0 TERG_07773T4 TERG_02967T1 TERG_01952T1 TERG_12584T0 TERG_07337T0 TERG_01030T1 TERG_08425T0 TERG_03151T0 TERG_04145T1 TERG_01046T0 TERG_02376T0 TERG_01258T0 TERG_0617…
	cytoplasmic part	7	GO:0044444	192	347	610	1865	1.69	2.99015e-22	21.52	TERG_08637T0 TERG_02237T0 TERG_12173T0 TERG_01169T0 TERG_00102T0 TERG_01256T0 TERG_02752T0 TERG_07002T0 TERG_07643T0 TERG_01604T0 TERG_02404T0 TERG_08655T0 TERG_01952T1 TERG_07337T0 TERG_01030T1 TERG_03151T0 TERG_06817T0 TERG_02376T0 TERG_01258T0 TERG_06173T2 TERG_02020T1 TERG_07729T0 TERG_04821T0 TERG_06275T0 TERG_05954T0 TERG_08213T0 TERG_12172T0 TERG_00230T0 TERG_04299T0 TERG_06453T0 TERG_0405…
	ribosome	8	GO:0005840	85	126	610	1865	2.06	1.2987e-16	15.89	TERG_02237T0 TERG_06353T0 TERG_00105T0 TERG_00383T0 TERG_02858T0 TERG_02895T0 TERG_03605T0 TERG_01169T0 TERG_01256T0 TERG_07002T0 TERG_02604T0 TERG_01604T0 TERG_02404T0 TERG_00242T3 TERG_01952T1 TERG_07337T0 TERG_05283T0 TERG_05866T0 TERG_07385T0 TERG_03738T0 TERG_02376T0 TERG_05183T0 TERG_02971T0 TERG_04772T0 TERG_07176T0 TERG_05685T0 TERG_06275T0 TERG_07944T0 TERG_05825T0 TERG_00650T1 TERG_0645…
	ribonucleoprotein complex	6	GO:0030529	95	155	610	1865	1.87	2.13816e-14	13.67	TERG_02237T0 TERG_06353T0 TERG_00105T0 TERG_00383T0 TERG_02858T0 TERG_02895T0 TERG_03605T0 TERG_01169T0 TERG_01256T0 TERG_07002T0 TERG_02604T0 TERG_01604T0 TERG_02404T0 TERG_02967T1 TERG_00242T3 TERG_01952T1 TERG_07337T0 TERG_05283T0 TERG_05866T0 TERG_07385T0 TERG_03738T0 TERG_01046T0 TERG_02376T0 TERG_05183T0 TERG_02971T0 TERG_07729T0 TERG_04772T0 TERG_07176T0 TERG_05685T0 TERG_06275T0 TERG_0794…
	non-membrane-bounded organelle	3	GO:0043228	126	233	610	1865	1.65	4.62139e-13	12.34	TERG_08637T0 TERG_02237T0 TERG_03276T0 TERG_06353T0 TERG_00105T0 TERG_03652T1 TERG_00383T0 TERG_05767T1 TERG_02858T0 TERG_07904T0 TERG_02895T0 TERG_03605T0 TERG_01169T0 TERG_01256T0 TERG_04413T0 TERG_07002T0 TERG_02631T0 TERG_02604T0 TERG_05039T1 TERG_01604T0 TERG_07904T2 TERG_02404T0 TERG_07773T4 TERG_00242T3 TERG_01952T1 TERG_07337T0 TERG_05283T0 TERG_05866T0 TERG_07385T0 TERG_02496T0 TERG_0373…
	intracellular non-membrane-bounded organelle	7	GO:0043232	126	233	610	1865	1.65	4.62139e-13	12.34	TERG_08637T0 TERG_02237T0 TERG_03276T0 TERG_06353T0 TERG_00105T0 TERG_03652T1 TERG_00383T0 TERG_05767T1 TERG_02858T0 TERG_07904T0 TERG_02895T0 TERG_03605T0 TERG_01169T0 TERG_01256T0 TERG_04413T0 TERG_07002T0 TERG_02631T0 TERG_02604T0 TERG_05039T1 TERG_01604T0 TERG_07904T2 TERG_02404T0 TERG_07773T4 TERG_00242T3 TERG_01952T1 TERG_07337T0 TERG_05283T0 TERG_05866T0 TERG_07385T0 TERG_02496T0 TERG_0373…
	catalytic complex	4	GO:1902494	36	66	610	1865	1.67	0.000159572	3.8	TERG_05184T0 TERG_12173T0 TERG_02277T0 TERG_08193T0 TERG_08449T0 TERG_06682T2 TERG_02752T0 TERG_12688T0 TERG_03260T0 TERG_04001T0 TERG_07643T0 TERG_07396T0 TERG_05581T0 TERG_00906T0 TERG_12687T0 TERG_08590T0 TERG_04540T0 TERG_06097T0 TERG_04821T0 TERG_05590T0 TERG_05514T0 TERG_01676T0 TERG_08153T0 TERG_12172T0 TERG_03869T2 TERG_01612T0 TERG_07590T0 TERG_02778T0 TERG_02482T0 TERG_02628T0 TERG_0378…

## Sheet: mycelia
GO Terms Level 1	GO Terms Description	GO Terms Level	GO Terms ID	Mapping	Background	All Mapping	All Background	Fold Enrichment	Fisher' exact test P value	-log10(p value)	Related Protein
Biological Process	translation	7	GO:0006412	142	215	1021	3777	2.44	6.44251e-35	34.19	TERG_02237T0 TERG_00077T0 TERG_00063T0 TERG_01169T0 TERG_01256T0 TERG_07002T0 TERG_01604T0 TERG_02404T0 TERG_06577T0 TERG_04542T1 TERG_07337T0 TERG_02376T0 TERG_06275T0 TERG_06454T0 TERG_06958T0 TERG_06917T0 TERG_06453T0 TERG_04057T0 TERG_07735T0 TERG_05236T1 TERG_01045T1 TERG_06362T0 TERG_01892T0 TERG_03300T1 TERG_06218T0 TERG_07038T0 TERG_00462T0 TERG_03080T0 TERG_03050T0 TERG_04033T0 TERG_0286…
	cellular amino acid metabolic process	8	GO:0006520	108	214	1021	3777	1.87	4.97477e-14	13.3	TERG_07966T0 TERG_05184T0 TERG_04470T0 TERG_06568T0 TERG_07187T0 TERG_07518T0 TERG_00063T0 TERG_00694T1 TERG_07605T0 TERG_07611T0 TERG_04198T0 TERG_00946T0 TERG_05419T0 TERG_04454T0 TERG_03384T0 TERG_04811T0 TERG_06909T0 TERG_04363T0 TERG_01033T0 TERG_05524T1 TERG_06707T0 TERG_07905T0 TERG_06843T0 TERG_07127T0 TERG_01419T0 TERG_03656T0 TERG_04751T1 TERG_03834T1 TERG_06454T0 TERG_06958T0 TERG_0245…
	small molecule metabolic process	4	GO:0044281	218	473	1021	3777	1.7	8.45879e-13	12.07	TERG_06568T0 TERG_03414T0 TERG_07187T0 TERG_00063T0 TERG_02535T0 TERG_00694T1 TERG_00102T0 TERG_07605T0 TERG_02768T1 TERG_01446T0 TERG_07643T0 TERG_03384T0 TERG_05251T1 TERG_05679T0 TERG_06744T0 TERG_08887T0 TERG_04752T0 TERG_04363T0 TERG_05524T1 TERG_05989T0 TERG_04145T1 TERG_01258T0 TERG_12462T0 TERG_07905T0 TERG_02020T1 TERG_00074T0 TERG_06119T0 TERG_07127T0 TERG_07202T0 TERG_01419T0 TERG_0475…
	organonitrogen compound metabolic process	4	GO:1901564	174	418	1021	3777	1.54	1.09623e-12	11.96	TERG_06568T0 TERG_07187T0 TERG_00063T0 TERG_07768T0 TERG_02535T0 TERG_00694T1 TERG_03843T1 TERG_07605T0 TERG_02768T1 TERG_01446T0 TERG_07643T0 TERG_03384T0 TERG_08887T0 TERG_06103T0 TERG_04752T0 TERG_04363T0 TERG_05524T1 TERG_05989T0 TERG_04145T1 TERG_01258T0 TERG_12462T0 TERG_07905T0 TERG_02020T1 TERG_00074T0 TERG_06119T0 TERG_07127T0 TERG_01419T0 TERG_04026T1 TERG_04751T1 TERG_03834T1 TERG_0645…
	oxoacid metabolic process	6	GO:0043436	153	310	1021	3777	1.83	1.32772e-12	11.88	TERG_06568T0 TERG_03414T0 TERG_07187T0 TERG_00063T0 TERG_00694T1 TERG_00102T0 TERG_07605T0 TERG_03384T0 TERG_05251T1 TERG_05679T0 TERG_06744T0 TERG_04363T0 TERG_05524T1 TERG_07905T0 TERG_00074T0 TERG_07127T0 TERG_07202T0 TERG_01419T0 TERG_04751T1 TERG_06454T0 TERG_03834T1 TERG_06958T0 TERG_11518T0 TERG_01045T1 TERG_12700T0 TERG_07149T0 TERG_00070T0 TERG_01892T0 TERG_07777T0 TERG_04580T0 TERG_0703…
	carboxylic acid metabolic process	7	GO:0019752	153	310	1021	3777	1.83	1.32772e-12	11.88	TERG_06568T0 TERG_03414T0 TERG_07187T0 TERG_00063T0 TERG_00694T1 TERG_00102T0 TERG_07605T0 TERG_03384T0 TERG_05251T1 TERG_05679T0 TERG_06744T0 TERG_04363T0 TERG_05524T1 TERG_07905T0 TERG_00074T0 TERG_07127T0 TERG_07202T0 TERG_01419T0 TERG_04751T1 TERG_06454T0 TERG_03834T1 TERG_06958T0 TERG_11518T0 TERG_01045T1 TERG_12700T0 TERG_07149T0 TERG_00070T0 TERG_01892T0 TERG_07777T0 TERG_04580T0 TERG_0703…
	organic acid metabolic process	5	GO:0006082	153	312	1021	3777	1.81	1.69387e-12	11.77	TERG_06568T0 TERG_03414T0 TERG_07187T0 TERG_00063T0 TERG_00694T1 TERG_00102T0 TERG_07605T0 TERG_03384T0 TERG_05251T1 TERG_05679T0 TERG_06744T0 TERG_04363T0 TERG_05524T1 TERG_07905T0 TERG_00074T0 TERG_07127T0 TERG_07202T0 TERG_01419T0 TERG_04751T1 TERG_06454T0 TERG_03834T1 TERG_06958T0 TERG_11518T0 TERG_01045T1 TERG_12700T0 TERG_07149T0 TERG_00070T0 TERG_01892T0 TERG_07777T0 TERG_04580T0 TERG_0703…
	organic substance biosynthetic process	4	GO:1901576	323	764	1021	3777	1.56	2.25509e-12	11.65	TERG_02237T0 TERG_06568T0 TERG_03414T0 TERG_07187T0 TERG_00063T0 TERG_02535T0 TERG_01169T0 TERG_03843T1 TERG_01256T0 TERG_07605T0 TERG_07002T0 TERG_01604T0 TERG_06577T0 TERG_04542T1 TERG_07337T0 TERG_05524T1 TERG_04145T1 TERG_01258T0 TERG_07905T0 TERG_04821T0 TERG_01564T1 TERG_07127T0 TERG_01419T0 TERG_03834T1 TERG_02240T0 TERG_06917T0 TERG_06496T0 TERG_04057T0 TERG_07735T0 TERG_06362T0 TERG_0330…
	biosynthetic process	3	GO:0009058	342	821	1021	3777	1.54	3.49165e-12	11.46	TERG_02237T0 TERG_06568T0 TERG_03414T0 TERG_07187T0 TERG_00063T0 TERG_02535T0 TERG_01169T0 TERG_03843T1 TERG_01256T0 TERG_07605T0 TERG_07002T0 TERG_01604T0 TERG_06577T0 TERG_04542T1 TERG_03384T0 TERG_07337T0 TERG_05677T0 TERG_05524T1 TERG_04145T1 TERG_01258T0 TERG_07905T0 TERG_04821T0 TERG_01564T1 TERG_07127T0 TERG_01419T0 TERG_03834T1 TERG_02240T0 TERG_06917T0 TERG_06496T0 TERG_04057T0 TERG_0773…
	cellular biosynthetic process	4	GO:0044249	313	740	1021	3777	1.56	3.72102e-12	11.43	TERG_02237T0 TERG_06568T0 TERG_03414T0 TERG_07187T0 TERG_00063T0 TERG_02535T0 TERG_01169T0 TERG_01256T0 TERG_07605T0 TERG_07002T0 TERG_01604T0 TERG_06577T0 TERG_04542T1 TERG_07337T0 TERG_05524T1 TERG_04145T1 TERG_01258T0 TERG_07905T0 TERG_04821T0 TERG_07127T0 TERG_01419T0 TERG_03834T1 TERG_02240T0 TERG_06917T0 TERG_06496T0 TERG_04057T0 TERG_07735T0 TERG_06362T0 TERG_03300T1 TERG_08333T0 TERG_0024…
	gene expression	5	GO:0010467	180	405	1021	3777	1.64	1.94238e-07	6.71	TERG_02237T0 TERG_06219T0 TERG_00077T0 TERG_00063T0 TERG_01169T0 TERG_01256T0 TERG_07002T0 TERG_01604T0 TERG_02404T0 TERG_06577T0 TERG_04542T1 TERG_07396T0 TERG_02967T1 TERG_07337T0 TERG_02376T0 TERG_03147T0 TERG_06275T0 TERG_00427T0 TERG_07346T0 TERG_07806T0 TERG_06454T0 TERG_06958T0 TERG_06917T0 TERG_06453T0 TERG_04057T0 TERG_07735T0 TERG_05236T1 TERG_01045T1 TERG_04393T0 TERG_06362T0 TERG_0189…
	organonitrogen compound biosynthetic process	5	GO:1901566	96	228	1021	3777	1.56	2.77744e-07	6.56	TERG_06640T1 TERG_06568T0 TERG_07187T0 TERG_07768T0 TERG_06846T0 TERG_02535T0 TERG_00694T1 TERG_03843T1 TERG_07605T0 TERG_01446T0 TERG_04454T0 TERG_07434T0 TERG_08056T0 TERG_06157T4 TERG_04811T0 TERG_08887T0 TERG_06221T1 TERG_06103T0 TERG_04752T0 TERG_03472T0 TERG_04363T0 TERG_05524T1 TERG_05989T0 TERG_04145T1 TERG_01258T0 TERG_07905T0 TERG_02020T1 TERG_00074T0 TERG_07127T0 TERG_01419T0 TERG_0402…
	cellular macromolecule biosynthetic process	6	GO:0034645	187	431	1021	3777	1.61	4.48892e-07	6.35	TERG_02237T0 TERG_00077T0 TERG_00063T0 TERG_01169T0 TERG_01256T0 TERG_07002T0 TERG_01604T0 TERG_02404T0 TERG_06577T0 TERG_04542T1 TERG_07396T0 TERG_07337T0 TERG_00994T1 TERG_02376T0 TERG_04821T0 TERG_06275T0 TERG_06454T0 TERG_03447T0 TERG_04299T0 TERG_02240T0 TERG_06958T0 TERG_06917T0 TERG_06453T0 TERG_04057T0 TERG_07735T0 TERG_05236T1 TERG_01045T1 TERG_06362T0 TERG_01892T0 TERG_03300T1 TERG_0621…
	macromolecule biosynthetic process	5	GO:0009059	189	441	1021	3777	1.59	7.64137e-07	6.12	TERG_02237T0 TERG_00077T0 TERG_00063T0 TERG_01169T0 TERG_03843T1 TERG_01256T0 TERG_07002T0 TERG_01604T0 TERG_02404T0 TERG_06577T0 TERG_04542T1 TERG_07396T0 TERG_07337T0 TERG_00994T1 TERG_02376T0 TERG_04821T0 TERG_06275T0 TERG_06454T0 TERG_03447T0 TERG_04299T0 TERG_02240T0 TERG_06958T0 TERG_06917T0 TERG_06453T0 TERG_04057T0 TERG_07735T0 TERG_05236T1 TERG_01045T1 TERG_06362T0 TERG_01892T0 TERG_0384…
Molecular Function	structural constituent of ribosome	3	GO:0003735	93	125	1374	5039	2.73	1.47095e-28	27.83	TERG_02237T0 TERG_00105T0 TERG_00383T0 TERG_02858T0 TERG_02895T0 TERG_01169T0 TERG_01256T0 TERG_07002T0 TERG_01952T0 TERG_02604T0 TERG_01604T0 TERG_02404T0 TERG_06577T0 TERG_00242T3 TERG_07337T0 TERG_05283T0 TERG_07385T0 TERG_05866T0 TERG_04835T0 TERG_03738T0 TERG_02376T0 TERG_05183T0 TERG_02971T0 TERG_04772T0 TERG_07176T0 TERG_05685T0 TERG_06275T0 TERG_07944T0 TERG_05825T0 TERG_00650T1 TERG_0645…
	structural molecule activity	2	GO:0005198	107	160	1374	5039	2.45	2.6548e-26	25.58	TERG_02237T0 TERG_00105T0 TERG_00383T0 TERG_02858T0 TERG_07904T0 TERG_12523T0 TERG_02895T0 TERG_01169T0 TERG_01256T0 TERG_07002T0 TERG_01952T0 TERG_02604T0 TERG_01604T0 TERG_07904T2 TERG_02404T0 TERG_06577T0 TERG_07773T4 TERG_00242T3 TERG_07337T0 TERG_01030T1 TERG_05283T0 TERG_05866T0 TERG_07385T0 TERG_04835T0 TERG_03738T0 TERG_02376T0 TERG_01565T0 TERG_05183T0 TERG_02971T0 TERG_04772T0 TERG_0717…
	RNA binding	5	GO:0003723	97	184	1374	5039	1.93	8.85079e-14	13.05	TERG_11751T0 TERG_03155T0 TERG_04893T0 TERG_06219T0 TERG_00077T0 TERG_04737T0 TERG_03362T0 TERG_02895T0 TERG_00694T1 TERG_07192T0 TERG_00983T0 TERG_04437T0 TERG_01952T0 TERG_02604T0 TERG_05039T1 TERG_02404T0 TERG_04542T1 TERG_02967T1 TERG_06563T0 TERG_01793T0 TERG_05866T0 TERG_04920T0 TERG_05183T0 TERG_07729T0 TERG_08179T0 TERG_06843T0 TERG_08429T4 TERG_03163T1 TERG_08432T0 TERG_07806T0 TERG_0336…
	translation factor activity, nucleic acid binding	6	GO:0008135	32	53	1374	5039	2.21	3.87788e-07	6.41	TERG_11751T0 TERG_03155T0 TERG_07950T0 TERG_00077T0 TERG_02104T0 TERG_06662T0 TERG_03453T3 TERG_07646T0 TERG_00983T0 TERG_05992T0 TERG_04542T1 TERG_05193T0 TERG_05864T0 TERG_06578T0 TERG_00640T0 TERG_08429T4 TERG_02418T0 TERG_00894T0 TERG_04542T2 TERG_04897T0 TERG_00155T0 TERG_00559T1 TERG_05194T0 TERG_06917T0 TERG_03453T1 TERG_04446T1 TERG_00548T0 TERG_06078T0 TERG_02878T1 TERG_03202T0 TERG_0213…
	translation initiation factor activity	7	GO:0003743	24	39	1374	5039	2.26	7.09854e-06	5.15	TERG_11751T0 TERG_03155T0 TERG_08429T4 TERG_02418T0 TERG_02104T0 TERG_00894T0 TERG_04542T2 TERG_06662T0 TERG_00559T1 TERG_00155T0 TERG_03453T3 TERG_03453T1 TERG_07646T0 TERG_00983T0 TERG_05992T0 TERG_04542T1 TERG_05193T0 TERG_05864T0 TERG_06078T0 TERG_02878T1 TERG_00640T0 TERG_02139T0 TERG_03202T0 TERG_00171T0
	GTPase activity	8	GO:0003924	35	67	1374	5039	1.92	1.14832e-05	4.94	TERG_05071T0 TERG_00077T0 TERG_03500T0 TERG_07904T0 TERG_08956T0 TERG_01764T2 TERG_03906T0 TERG_07904T2 TERG_01874T0 TERG_07748T0 TERG_07773T4 TERG_12154T0 TERG_01187T0 TERG_05987T0 TERG_07729T0 TERG_07773T0 TERG_04151T0 TERG_02424T0 TERG_02060T0 TERG_00894T0 TERG_08542T0 TERG_05194T0 TERG_06917T0 TERG_04904T0 TERG_05182T0 TERG_01356T0 TERG_01587T0 TERG_03038T0 TERG_00548T0 TERG_03500T1 TERG_0492…
	isomerase activity	3	GO:0016853	33	64	1374	5039	1.89	2.90087e-05	4.54	TERG_03435T1 TERG_01843T0 TERG_08274T0 TERG_03144T0 TERG_01475T0 TERG_00187T0 TERG_01624T0 TERG_01573T0 TERG_03427T0 TERG_02590T0 TERG_08302T0 TERG_00250T0 TERG_03896T1 TERG_08179T0 TERG_05527T0 TERG_02040T2 TERG_07826T0 TERG_05954T0 TERG_06182T1 TERG_02601T0 TERG_01800T1 TERG_00342T0 TERG_05002T0 TERG_08498T0 TERG_00131T0 TERG_06858T0 TERG_05282T0 TERG_04857T0 TERG_04662T0 TERG_01448T0 TERG_0097…
	aminoacyl-tRNA ligase activity	6	GO:0004812	28	53	1374	5039	1.94	6.62409e-05	4.18	TERG_00461T1 TERG_06843T0 TERG_07966T0 TERG_04470T0 TERG_00363T0 TERG_06612T0 TERG_03656T0 TERG_07518T0 TERG_00063T0 TERG_06454T0 TERG_04967T0 TERG_06958T0 TERG_04198T0 TERG_00946T0 TERG_01045T1 TERG_02324T0 TERG_01892T0 TERG_01112T0 TERG_05279T0 TERG_01045T0 TERG_07038T0 TERG_01921T0 TERG_08876T0 TERG_01033T0 TERG_06907T0 TERG_03080T0 TERG_04702T0 TERG_03050T0
Cellular Component	cytoplasm	6	GO:0005737	264	501	529	1865	1.86	8.34555e-43	42.08	TERG_02237T0 TERG_00063T0 TERG_01169T0 TERG_01256T0 TERG_07002T0 TERG_03906T0 TERG_07643T0 TERG_01604T0 TERG_06577T0 TERG_04542T1 TERG_08655T0 TERG_06421T0 TERG_08403T0 TERG_06173T0 TERG_07337T0 TERG_06817T0 TERG_01258T0 TERG_04821T0 TERG_05856T0 TERG_05954T0 TERG_08213T0 TERG_04057T0 TERG_07735T0 TERG_06362T0 TERG_03300T1 TERG_04704T0 TERG_07823T0 TERG_01560T0 TERG_07540T0 TERG_02020T0 TERG_0403…
	cytoplasmic part	7	GO:0044444	193	347	529	1865	1.96	6.09185e-33	32.22	TERG_08637T0 TERG_02237T0 TERG_01169T0 TERG_00102T0 TERG_01256T0 TERG_07002T0 TERG_06096T0 TERG_03906T0 TERG_07643T0 TERG_01604T0 TERG_02404T0 TERG_06577T0 TERG_08655T0 TERG_06173T0 TERG_07337T0 TERG_01030T1 TERG_06817T0 TERG_02376T0 TERG_01258T0 TERG_02020T1 TERG_07729T0 TERG_04821T0 TERG_06275T0 TERG_05856T0 TERG_05954T0 TERG_08213T0 TERG_04299T0 TERG_06453T0 TERG_04057T0 TERG_07735T0 TERG_0523…
	ribosome	8	GO:0005840	94	126	529	1865	2.63	6.14017e-29	28.21	TERG_02237T0 TERG_00105T0 TERG_00383T0 TERG_02858T0 TERG_02895T0 TERG_01169T0 TERG_01256T0 TERG_07002T0 TERG_01952T0 TERG_02604T0 TERG_01604T0 TERG_02404T0 TERG_06577T0 TERG_00242T3 TERG_07337T0 TERG_05283T0 TERG_07385T0 TERG_05866T0 TERG_04835T0 TERG_03738T0 TERG_02376T0 TERG_05183T0 TERG_02971T0 TERG_04772T0 TERG_07176T0 TERG_05685T0 TERG_06275T0 TERG_07944T0 TERG_05825T0 TERG_00650T1 TERG_0645…
	ribonucleoprotein complex	6	GO:0030529	103	155	529	1865	2.34	5.74948e-25	24.24	TERG_02237T0 TERG_00105T0 TERG_00383T0 TERG_02858T0 TERG_02895T0 TERG_01169T0 TERG_01256T0 TERG_07002T0 TERG_01952T0 TERG_02604T0 TERG_01604T0 TERG_02404T0 TERG_06577T0 TERG_02967T1 TERG_00242T3 TERG_07337T0 TERG_05283T0 TERG_05866T0 TERG_07385T0 TERG_04835T0 TERG_03738T0 TERG_01046T0 TERG_02376T0 TERG_05183T0 TERG_02971T0 TERG_07729T0 TERG_04772T0 TERG_07176T0 TERG_05685T0 TERG_06275T0 TERG_0794…
	non-membrane-bounded organelle	3	GO:0043228	132	233	529	1865	2	2.16031e-22	21.67	TERG_08637T0 TERG_02237T0 TERG_07904T0 TERG_01169T0 TERG_00111T0 TERG_01256T0 TERG_07002T0 TERG_03906T0 TERG_05039T1 TERG_01604T0 TERG_07904T2 TERG_02404T0 TERG_06577T0 TERG_07773T4 TERG_07337T0 TERG_07882T0 TERG_01046T0 TERG_02376T0 TERG_02930T0 TERG_06275T0 TERG_02630T0 TERG_06182T1 TERG_06453T0 TERG_04057T0 TERG_07735T0 TERG_05236T1 TERG_06362T0 TERG_03068T0 TERG_03300T1 TERG_12303T0 TERG_0621…
	intracellular non-membrane-bounded organelle	7	GO:0043232	132	233	529	1865	2	2.16031e-22	21.67	TERG_08637T0 TERG_02237T0 TERG_07904T0 TERG_01169T0 TERG_00111T0 TERG_01256T0 TERG_07002T0 TERG_03906T0 TERG_05039T1 TERG_01604T0 TERG_07904T2 TERG_02404T0 TERG_06577T0 TERG_07773T4 TERG_07337T0 TERG_07882T0 TERG_01046T0 TERG_02376T0 TERG_02930T0 TERG_06275T0 TERG_02630T0 TERG_06182T1 TERG_06453T0 TERG_04057T0 TERG_07735T0 TERG_05236T1 TERG_06362T0 TERG_03068T0 TERG_03300T1 TERG_12303T0 TERG_0621…
	macromolecular complex	2	GO:0032991	243	503	529	1865	1.7	6.52759e-09	8.19	TERG_00305T0 TERG_02237T0 TERG_04380T0 TERG_02221T3 TERG_07904T0 TERG_01169T0 TERG_00102T0 TERG_00111T0 TERG_01256T0 TERG_08555T0 TERG_07002T0 TERG_06096T0 TERG_03906T0 TERG_07643T0 TERG_01604T0 TERG_07904T2 TERG_02404T0 TERG_06577T0 TERG_07396T0 TERG_07773T4 TERG_06173T0 TERG_02967T1 TERG_07337T0 TERG_01030T1 TERG_08425T0 TERG_07882T0 TERG_04145T1 TERG_01046T0 TERG_02376T0 TERG_01258T0 TERG_0202…
	ribosomal subunit	9	GO:0044391	16	19	529	1865	2.97	5.8255e-07	6.23	TERG_02377T0 TERG_02861T0 TERG_07066T0 TERG_07151T0 TERG_03430T0 TERG_00383T0 TERG_05866T0 TERG_07601T0 TERG_00462T0 TERG_00189T0 TERG_06365T0 TERG_00891T0 TERG_07002T0 TERG_01952T0 TERG_01415T0 TERG_02604T0
